# Supplementary material for: Sterically crowded 1,4-diiodobenzene as a precursor to difunctional hypervalent iodine compounds
Source: Royal Society of Chemistry journal article supplement (doi:10.1039/d1cc06486j), 2022-01-01
Supplement: d1cc06486j1.pdf [file d1cc06486j1.pdf]

## Supporting Information for

### **Sterically Crowded 1,4-Diiodobenzene as Precursor to Difunctional Hypervalent Iodine Compounds**

Guobi Li,<sup>a</sup> Rhett Smith,<sup>a</sup> Milan Gembicky,<sup>b</sup> Arnold L. Rheingold<sup>b</sup> and John D. Protasiewicz<sup>a\*</sup>

*Chemistry Department, Case Western Reserve University, Cleveland, OH, 44106*

*Chemistry and Biochemistry Department, University of California San Diego, La Jolla, CA, 92093*

*Email: protasiewicz@case.edu*

#### Contents

|                                 |    |
|---------------------------------|----|
| Experiment Procedures .....     | 2  |
| NMR Spectra .....               | 3  |
| Crystallographic Analysis ..... | 8  |
| Computational Studies.....      | 34 |
| References .....                | 37 |

## Experiment Procedures

**General Information.** All starting materials, reagents, and solvents were purchased from commercial sources and used without further purification.  $^1\text{H}$  NMR and  $^{13}\text{C}$   $\{^1\text{H}\}$  NMR spectra were obtained on Bruker Avance III HD 500 MHz NMR Spectrometer. Chemical shifts ( $\delta$ ) are reported in parts per million (ppm). Melting points were determined with melting points apparatus and are uncorrected.

**Method:** As shown in **Scheme 1**, the unusual 1,4-diiodobenzene (**1**) bearing four *para*- $t$ Bu- $\text{C}_6\text{H}_4$  groups was prepared according to our previous paper.<sup>1</sup> **1** was then oxidized into (diacetoxyiodo)iodoarenes (**2**) through sodium hyperchlorite pentahydrate.<sup>2</sup> **2** was expected to react with trifluoroacetic acid (TFA) to synthesize [bis(trifluoroacetoxy)iodoarenes], but it was cyclized to form iodonium salts to give compound **3**.

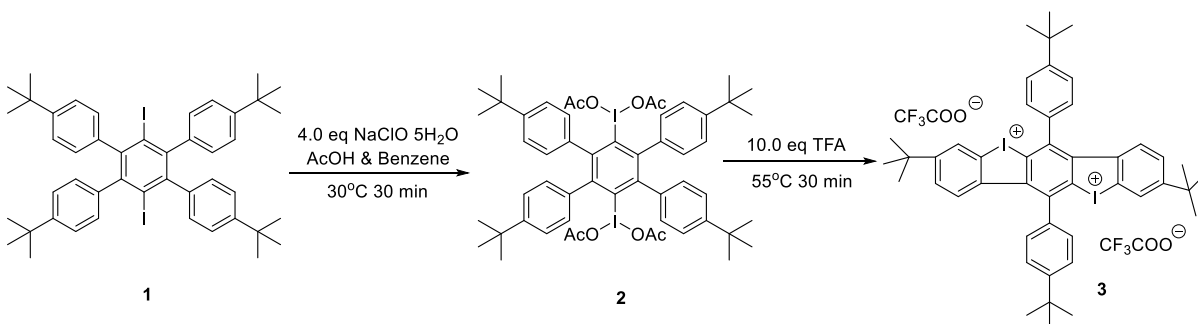

**Scheme S1.** Synthesis of hypervalent iodine with di-iodine(III) centers compounds **2** and **3**.

**2,3,5,6-tetra-*tert*butylphenyl-1,4-(diacetoxyiodo)benzene (2):** Sodium hyperchlorate pentahydrate (1.32 g, 4.0 mmol) and compound **1** (0.858 g, 1.0 mmol) were added into a 50 mL flask with a stir bar. Glacial acetic acid (10 mL) and benzene (10 mL) were added and stirred at 30°C for 30 min. Concentrated to remove the solvent and extracted with DCM. Dried over Na<sub>2</sub>SO<sub>4</sub> and concentrated to obtain white solid. Crystals were obtained from slow evaporation of DCM. Yield: 0.81 g, 73.9%. Melting points: greater than 350 °C.  $^1\text{H}$  NMR (500 MHz, Chloroform-*d*)  $\delta$  = 7.12 (s, 2H), 7.01 (d,  $J$  = 8.0 Hz, 2H), 1.98 (s, 3H), 1.20 (s, 9H).  $^{13}\text{C}$   $\{^1\text{H}\}$  NMR (126 MHz, Chloroform-*d*)  $\delta$  = 176.30, 151.47, 146.84, 139.33, 137.05, 129.29, 124.24, 34.66, 31.28, 20.69.

**2,6,7,10-tetra-*tert*butyl-bisdibenziodolium trifluoroacetate (3):** Compound **2** (1.09 g, 1.0 mmol) and TFA (10.0 eq, 0.77 mL) were added into a 50 mL flask with a stir bar. The mixture was stirred at 50°C for 30 min and cooled down to room temperature. DI water (30 mL) was added and the mixture was extracted with DCM. Dried over Na<sub>2</sub>SO<sub>4</sub> and concentrated to obtain the solid. Crystals were obtained from vapor diffusion (hexanes into a solution of **3** in DCM). Yield: 0.42 g, 38.8%. Melting points: greater than 350 °C.  $^1\text{H}$  NMR (500 MHz, Chloroform-*d*)  $\delta$  = 8.39 (s, 1H), 7.81 (d,  $J$  = 8.4 Hz, 2H), 7.43 (d,  $J$  = 8.3 Hz, 2H), 7.34 (d,  $J$  = 8.6 Hz, 1H), 6.74 (d,  $J$  = 8.6 Hz, 1H), 1.51 (s, 9H), 1.30 (s, 9H).  $^{13}\text{C}$   $\{^1\text{H}\}$  NMR (126 MHz, Chloroform-*d*)  $\delta$  = 162.24, 161.95, 161.66, 161.37, 156.85, 155.70, 141.35, 138.06, 137.53, 137.13, 135.53, 130.33, 128.76, 128.37, 127.46, 123.30, 117.16, 114.84, 36.03, 35.51, 31.42, 30.90.  $^{19}\text{F}$   $\{^1\text{H}\}$  NMR (471 MHz, Chloroform-*d*)  $\delta$  = -75.61.

# NMR Spectra

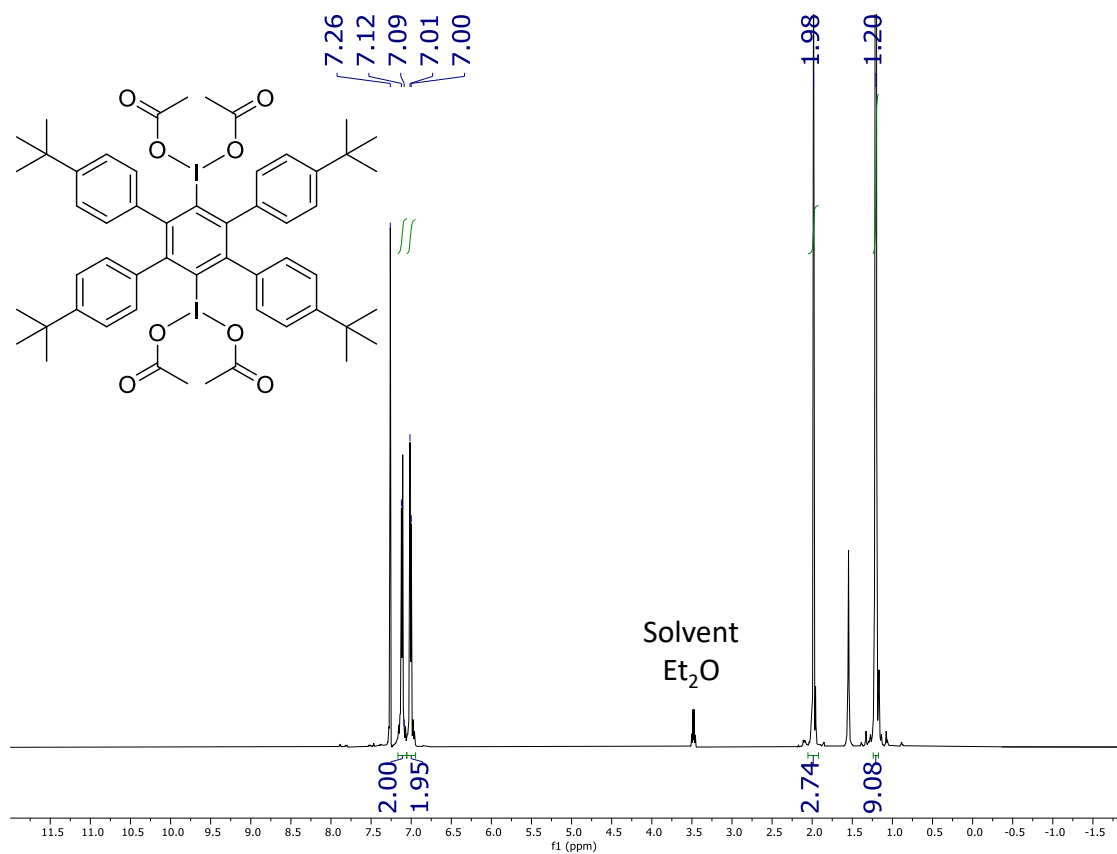

Figure S1. <sup>1</sup>H NMR spectrum of 2 (CDCl<sub>3</sub>, 500 MHz, 298K)

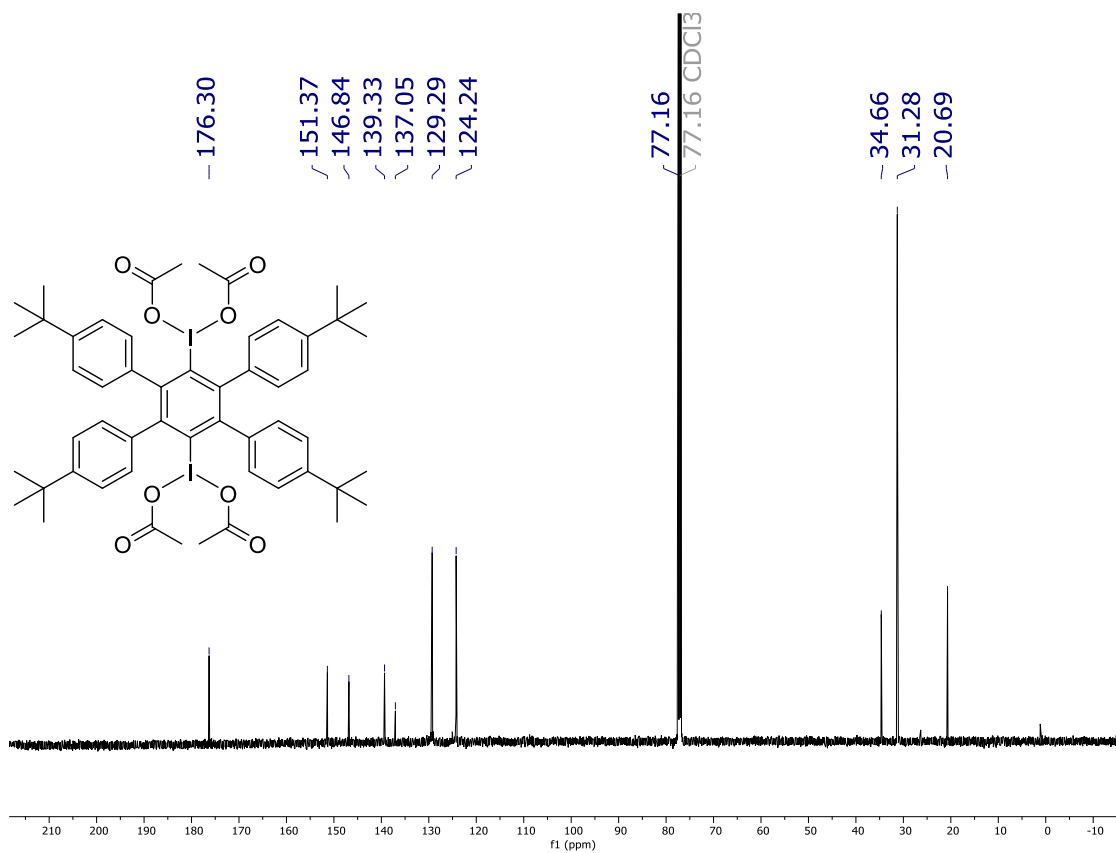

**Figure S2.**  $^{13}\text{C}$   $\{^1\text{H}\}$  NMR spectrum of 2 ( $\text{CDCl}_3$ , 126 MHz, 298K)

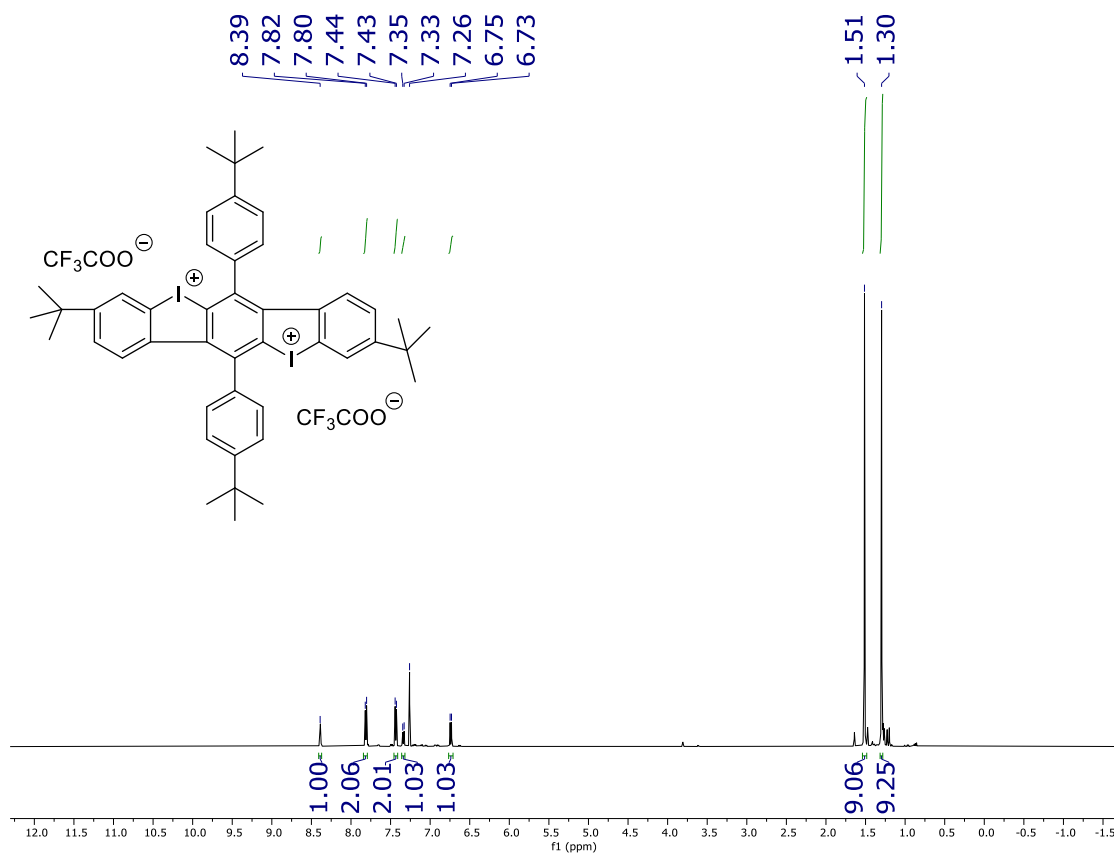

Figure S3.  $^1\text{H}$  NMR spectrum of **3** ( $\text{CDCl}_3$ , 500 MHz, 298K)

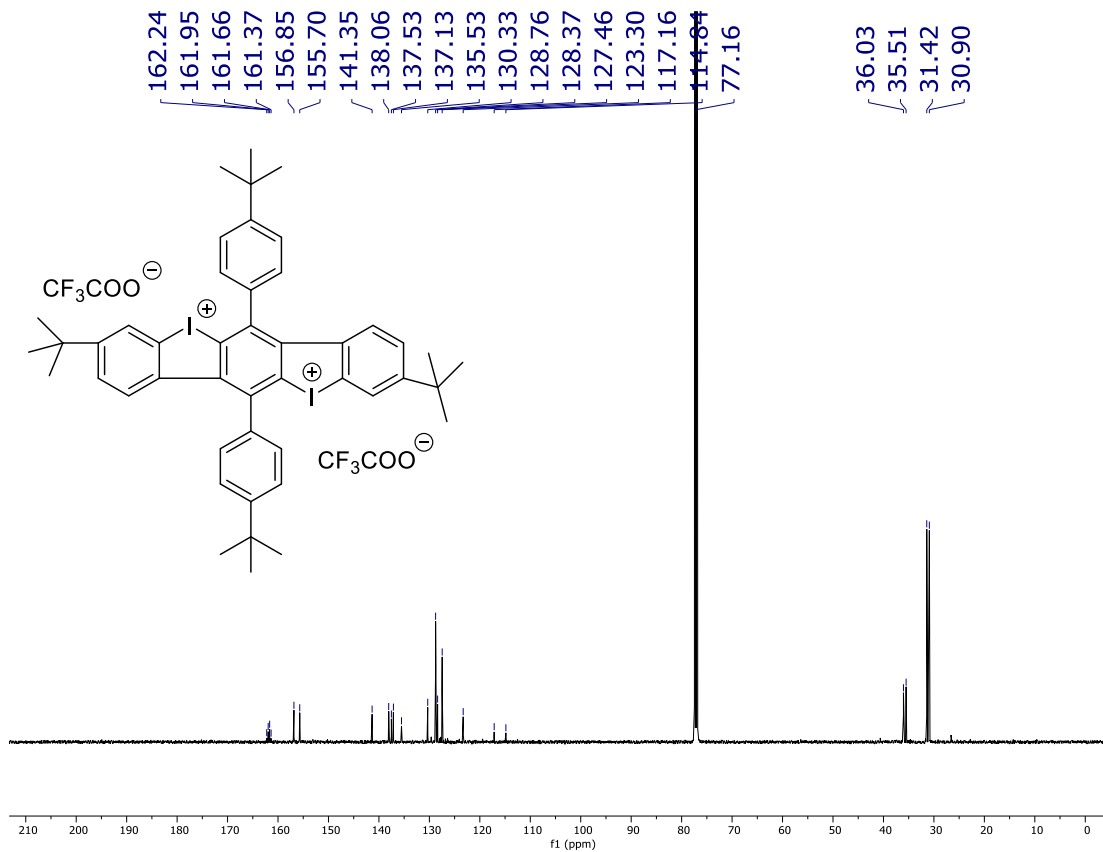

**Figure S4.**  $^{13}\text{C}$   $\{^1\text{H}\}$  NMR spectrum of **3** ( $\text{CDCl}_3$ , 126 MHz, 298K)

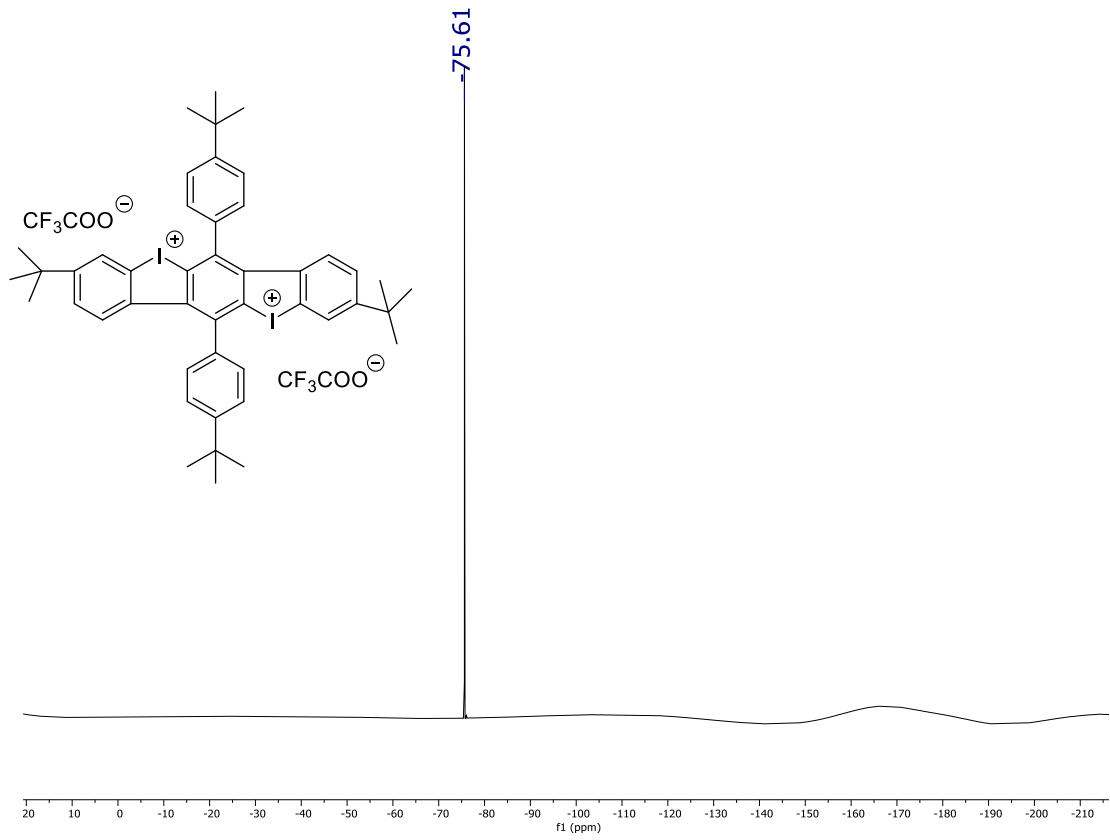

**Figure S5.**  $^{19}\text{F}$   $\{^1\text{H}\}$  NMR spectrum of **3** ( $\text{CDCl}_3$ , 471 MHz, 298K)

## Crystallographic Analysis

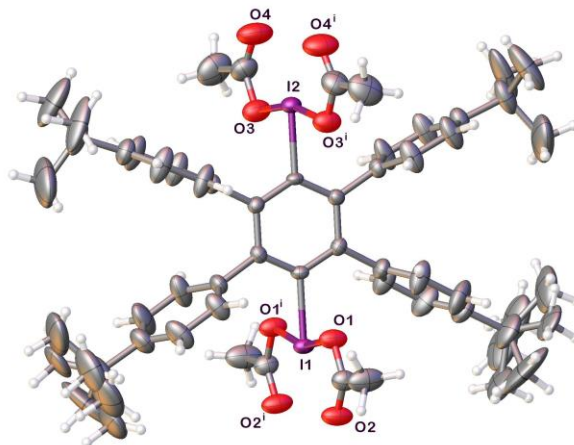

**Figure S5.** Structural diagram of compound **2**.

**Table S1.** Crystal data and structure refinement for compound **2\_200K\_sq**.

|                                   |                                                               |          |
|-----------------------------------|---------------------------------------------------------------|----------|
| Identification code               | compound <b>2</b>                                             |          |
| Empirical formula                 | C <sub>54</sub> H <sub>64</sub> I <sub>2</sub> O <sub>8</sub> |          |
| Formula weight                    | 1094.85                                                       |          |
| Temperature                       | 100.0 K                                                       |          |
| Wavelength                        | 0.71073 Å                                                     |          |
| Crystal system                    | Orthorhombic                                                  |          |
| Space group                       | Pnna                                                          |          |
| Unit cell dimensions              | a = 21.9600(4) Å                                              | ∠ = 90°. |
|                                   | b = 15.2357(3) Å                                              | ∠ = 90°. |
|                                   | c = 18.1317(4) Å                                              | ∠ = 90°. |
| Volume                            | 6066.4(2) Å <sup>3</sup>                                      |          |
| Z                                 | 4                                                             |          |
| Density (calculated)              | 1.199 Mg/m <sup>3</sup>                                       |          |
| Absorption coefficient            | 1.080 mm <sup>-1</sup>                                        |          |
| F(000)                            | 2232                                                          |          |
| Crystal size                      | 0.31 x 0.13 x 0.08 mm <sup>3</sup>                            |          |
| Theta range for data collection   | 1.456 to 26.370°.                                             |          |
| Index ranges                      | -27<=h<=27, -19<=k<=11, -22<=l<=22                            |          |
| Reflections collected             | 38417                                                         |          |
| Independent reflections           | 6222 [R(int) = 0.0618]                                        |          |
| Completeness to theta = 25.242°   | 100.0 %                                                       |          |
| Absorption correction             | Semi-empirical from equivalents                               |          |
| Max. and min. transmission        | 0.5626 and 0.5095                                             |          |
| Refinement method                 | Full-matrix least-squares on F <sup>2</sup>                   |          |
| Data / restraints / parameters    | 6222 / 36 / 330                                               |          |
| Goodness-of-fit on F <sup>2</sup> | 1.005                                                         |          |
| Final R indices [I>2sigma(I)]     | R1 = 0.0383, wR2 = 0.0908                                     |          |
| R indices (all data)              | R1 = 0.0760, wR2 = 0.1184                                     |          |
| Extinction coefficient            | n/a                                                           |          |
| Largest diff. peak and hole       | 1.423 and -0.757 e.Å <sup>-3</sup>                            |          |
| SQUEEZE                           | Found 78e/uc (likely two DCM)                                 |          |



**Table S2.** Atomic coordinates ( $\times 10^4$ ) and equivalent isotropic displacement parameters ( $\text{\AA}^2 \times 10^3$ ) for compound **2\_200K\_sq**.  $U(\text{eq})$  is defined as one third of the trace of the orthogonalized  $U^{ij}$  tensor.

|        | x        | y        | z        | U(eq)   |
|--------|----------|----------|----------|---------|
| I(1)   | 1844(1)  | 2500     | 2500     | 29(1)   |
| I(2)   | 4999(1)  | 2500     | 2500     | 34(1)   |
| O(1)   | 2015(1)  | 3850(2)  | 2779(2)  | 46(1)   |
| O(3)   | 4851(2)  | 1178(2)  | 2133(2)  | 55(1)   |
| O(2)   | 1011(2)  | 3878(2)  | 2773(2)  | 55(1)   |
| C(4)   | 4034(2)  | 2500     | 2500     | 23(1)   |
| C(1)   | 2808(2)  | 2500     | 2500     | 24(1)   |
| C(3)   | 3742(2)  | 2344(3)  | 3166(2)  | 26(1)   |
| C(2)   | 3096(2)  | 2339(3)  | 3164(2)  | 28(1)   |
| C(19)  | 4070(2)  | 2175(3)  | 3874(2)  | 32(1)   |
| O(4)   | 5856(2)  | 1157(3)  | 2173(3)  | 82(1)   |
| C(9)   | 2757(2)  | 2149(3)  | 3856(2)  | 35(1)   |
| C(10)  | 2531(2)  | 1329(3)  | 4010(3)  | 52(1)   |
| C(22)  | 4592(2)  | 1873(3)  | 5270(2)  | 48(1)   |
| C(5)   | 1496(2)  | 4254(3)  | 2861(3)  | 42(1)   |
| C(20)  | 4180(3)  | 1346(3)  | 4124(3)  | 57(2)   |
| C(12)  | 2119(3)  | 1799(4)  | 5173(3)  | 59(2)   |
| C(11)  | 2213(3)  | 1166(4)  | 4664(3)  | 64(2)   |
| C(7)   | 5378(3)  | 797(4)   | 2027(3)  | 59(2)   |
| C(24)  | 4242(3)  | 2856(4)  | 4329(3)  | 60(2)   |
| C(23)  | 4502(3)  | 2696(3)  | 5006(3)  | 65(2)   |
| C(21)  | 4439(3)  | 1195(3)  | 4806(3)  | 66(2)   |
| C(25)  | 4840(3)  | 1708(4)  | 6048(3)  | 69(2)   |
| C(14)  | 2654(3)  | 2799(4)  | 4368(3)  | 64(2)   |
| C(6)   | 1553(3)  | 5198(3)  | 3076(4)  | 72(2)   |
| C(13)  | 2341(3)  | 2614(4)  | 5015(3)  | 77(2)   |
| C(15)  | 1779(4)  | 1622(5)  | 5900(4)  | 91(2)   |
| C(27)  | 5264(5)  | 2392(5)  | 6298(5)  | 134(4)  |
| C(8)   | 5333(3)  | -95(4)   | 1678(4)  | 90(2)   |
| C(26)  | 5079(5)  | 815(5)   | 6153(4)  | 134(4)  |
| C(16)  | 1506(10) | 732(12)  | 5923(10) | 131(7)  |
| C(28)  | 4273(5)  | 1798(8)  | 6589(4)  | 165(5)  |
| C(17)  | 1303(10) | 2374(14) | 6009(13) | 191(12) |
| C(18)  | 2295(10) | 1694(16) | 6537(6)  | 152(8)  |
| C(17A) | 1895(15) | 2150(20) | 6488(14) | 98(9)   |
| C(18A) | 1870(20) | 710(30)  | 6180(20) | 129(12) |
| C(16A) | 1094(12) | 1570(30) | 5743(13) | 116(12) |

**Table S3.** Bond lengths [Å] and angles [°] for compound **2\_200K\_sq**.

---

|              |           |
|--------------|-----------|
| I(1)-O(1)#1  | 2.152(3)  |
| I(1)-O(1)    | 2.152(3)  |
| I(1)-C(1)    | 2.115(5)  |
| I(2)-O(3)#1  | 2.146(3)  |
| I(2)-O(3)    | 2.146(3)  |
| I(2)-C(4)    | 2.119(4)  |
| O(1)-C(5)    | 1.304(5)  |
| O(3)-C(7)    | 1.307(6)  |
| O(2)-C(5)    | 1.219(5)  |
| C(4)-C(3)    | 1.388(4)  |
| C(4)-C(3)#1  | 1.388(4)  |
| C(1)-C(2)#1  | 1.383(4)  |
| C(1)-C(2)    | 1.383(4)  |
| C(3)-C(2)    | 1.417(5)  |
| C(3)-C(19)   | 1.494(5)  |
| C(2)-C(9)    | 1.487(5)  |
| C(19)-C(20)  | 1.365(6)  |
| C(19)-C(24)  | 1.378(6)  |
| O(4)-C(7)    | 1.214(7)  |
| C(9)-C(10)   | 1.374(6)  |
| C(9)-C(14)   | 1.377(7)  |
| C(10)-H(10)  | 0.9500    |
| C(10)-C(11)  | 1.398(6)  |
| C(22)-C(23)  | 1.357(7)  |
| C(22)-C(21)  | 1.373(7)  |
| C(22)-C(25)  | 1.533(6)  |
| C(5)-C(6)    | 1.496(7)  |
| C(20)-H(20)  | 0.9500    |
| C(20)-C(21)  | 1.381(6)  |
| C(12)-C(11)  | 1.352(7)  |
| C(12)-C(13)  | 1.364(8)  |
| C(12)-C(15)  | 1.538(7)  |
| C(11)-H(11)  | 0.9500    |
| C(7)-C(8)    | 1.503(8)  |
| C(24)-H(24)  | 0.9500    |
| C(24)-C(23)  | 1.375(7)  |
| C(23)-H(23)  | 0.9500    |
| C(21)-H(21)  | 0.9500    |
| C(25)-C(27)  | 1.469(9)  |
| C(25)-C(26)  | 1.472(8)  |
| C(25)-C(28)  | 1.592(11) |
| C(14)-H(14)  | 0.9500    |
| C(14)-C(13)  | 1.388(7)  |
| C(6)-H(6A)   | 0.9800    |
| C(6)-H(6B)   | 0.9800    |
| C(6)-H(6C)   | 0.9800    |
| C(13)-H(13)  | 0.9500    |
| C(15)-C(16)  | 1.485(17) |
| C(15)-C(17)  | 1.564(17) |
| C(15)-C(18)  | 1.621(18) |
| C(15)-C(17A) | 1.36(3)   |

|                  |            |
|------------------|------------|
| C(15)-C(18A)     | 1.50(3)    |
| C(15)-C(16A)     | 1.53(3)    |
| C(27)-H(27A)     | 0.9800     |
| C(27)-H(27B)     | 0.9800     |
| C(27)-H(27C)     | 0.9800     |
| C(8)-H(8A)       | 0.9800     |
| C(8)-H(8B)       | 0.9800     |
| C(8)-H(8C)       | 0.9800     |
| C(26)-H(26A)     | 0.9800     |
| C(26)-H(26B)     | 0.9800     |
| C(26)-H(26C)     | 0.9800     |
| C(16)-H(16A)     | 0.9800     |
| C(16)-H(16B)     | 0.9800     |
| C(16)-H(16C)     | 0.9800     |
| C(28)-H(28A)     | 0.9800     |
| C(28)-H(28B)     | 0.9800     |
| C(28)-H(28C)     | 0.9800     |
| C(17)-H(17A)     | 0.9800     |
| C(17)-H(17B)     | 0.9800     |
| C(17)-H(17C)     | 0.9800     |
| C(18)-H(18A)     | 0.9800     |
| C(18)-H(18B)     | 0.9800     |
| C(18)-H(18C)     | 0.9800     |
| C(17A)-H(17D)    | 0.9800     |
| C(17A)-H(17E)    | 0.9800     |
| C(17A)-H(17F)    | 0.9800     |
| C(18A)-H(18D)    | 0.9800     |
| C(18A)-H(18E)    | 0.9800     |
| C(18A)-H(18F)    | 0.9800     |
| C(16A)-H(16D)    | 0.9800     |
| C(16A)-H(16E)    | 0.9800     |
| C(16A)-H(16F)    | 0.9800     |
| O(1)-I(1)-O(1)#1 | 159.89(17) |
| C(1)-I(1)-O(1)#1 | 79.95(8)   |
| C(1)-I(1)-O(1)   | 79.95(8)   |
| O(3)-I(2)-O(3)#1 | 162.65(18) |
| C(4)-I(2)-O(3)#1 | 81.32(9)   |
| C(4)-I(2)-O(3)   | 81.32(9)   |
| C(5)-O(1)-I(1)   | 109.0(3)   |
| C(7)-O(3)-I(2)   | 109.2(3)   |
| C(3)#1-C(4)-I(2) | 117.5(2)   |
| C(3)-C(4)-I(2)   | 117.5(2)   |
| C(3)-C(4)-C(3)#1 | 125.0(5)   |
| C(2)-C(1)-I(1)   | 117.3(2)   |
| C(2)#1-C(1)-I(1) | 117.3(2)   |
| C(2)#1-C(1)-C(2) | 125.4(5)   |
| C(4)-C(3)-C(2)   | 117.5(3)   |
| C(4)-C(3)-C(19)  | 123.7(4)   |
| C(2)-C(3)-C(19)  | 118.9(3)   |
| C(1)-C(2)-C(3)   | 117.3(4)   |
| C(1)-C(2)-C(9)   | 122.6(4)   |
| C(3)-C(2)-C(9)   | 120.0(4)   |

|                   |          |
|-------------------|----------|
| C(20)-C(19)-C(3)  | 122.0(4) |
| C(20)-C(19)-C(24) | 116.7(4) |
| C(24)-C(19)-C(3)  | 121.2(4) |
| C(10)-C(9)-C(2)   | 122.0(4) |
| C(10)-C(9)-C(14)  | 117.2(4) |
| C(14)-C(9)-C(2)   | 120.8(4) |
| C(9)-C(10)-H(10)  | 119.5    |
| C(9)-C(10)-C(11)  | 121.0(5) |
| C(11)-C(10)-H(10) | 119.5    |
| C(23)-C(22)-C(21) | 116.4(4) |
| C(23)-C(22)-C(25) | 121.8(4) |
| C(21)-C(22)-C(25) | 121.8(5) |
| O(1)-C(5)-C(6)    | 114.2(4) |
| O(2)-C(5)-O(1)    | 121.9(4) |
| O(2)-C(5)-C(6)    | 123.9(4) |
| C(19)-C(20)-H(20) | 119.1    |
| C(19)-C(20)-C(21) | 121.7(4) |
| C(21)-C(20)-H(20) | 119.1    |
| C(11)-C(12)-C(13) | 116.9(5) |
| C(11)-C(12)-C(15) | 122.3(6) |
| C(13)-C(12)-C(15) | 120.8(5) |
| C(10)-C(11)-H(11) | 119.0    |
| C(12)-C(11)-C(10) | 121.9(5) |
| C(12)-C(11)-H(11) | 119.0    |
| O(3)-C(7)-C(8)    | 113.9(5) |
| O(4)-C(7)-O(3)    | 122.1(5) |
| O(4)-C(7)-C(8)    | 123.9(5) |
| C(19)-C(24)-H(24) | 119.5    |
| C(23)-C(24)-C(19) | 121.0(5) |
| C(23)-C(24)-H(24) | 119.5    |
| C(22)-C(23)-C(24) | 122.6(5) |
| C(22)-C(23)-H(23) | 118.7    |
| C(24)-C(23)-H(23) | 118.7    |
| C(22)-C(21)-C(20) | 121.5(5) |
| C(22)-C(21)-H(21) | 119.2    |
| C(20)-C(21)-H(21) | 119.2    |
| C(22)-C(25)-C(28) | 105.9(5) |
| C(27)-C(25)-C(22) | 113.2(5) |
| C(27)-C(25)-C(26) | 113.0(6) |
| C(27)-C(25)-C(28) | 104.2(7) |
| C(26)-C(25)-C(22) | 113.5(5) |
| C(26)-C(25)-C(28) | 106.2(7) |
| C(9)-C(14)-H(14)  | 119.8    |
| C(9)-C(14)-C(13)  | 120.4(5) |
| C(13)-C(14)-H(14) | 119.8    |
| C(5)-C(6)-H(6A)   | 109.5    |
| C(5)-C(6)-H(6B)   | 109.5    |
| C(5)-C(6)-H(6C)   | 109.5    |
| H(6A)-C(6)-H(6B)  | 109.5    |
| H(6A)-C(6)-H(6C)  | 109.5    |
| H(6B)-C(6)-H(6C)  | 109.5    |
| C(12)-C(13)-C(14) | 122.6(5) |
| C(12)-C(13)-H(13) | 118.7    |

|                     |           |
|---------------------|-----------|
| C(14)-C(13)-H(13)   | 118.7     |
| C(12)-C(15)-C(17)   | 107.8(8)  |
| C(12)-C(15)-C(18)   | 105.1(7)  |
| C(16)-C(15)-C(12)   | 112.4(9)  |
| C(16)-C(15)-C(17)   | 113.3(12) |
| C(16)-C(15)-C(18)   | 108.9(11) |
| C(17)-C(15)-C(18)   | 109.1(13) |
| C(17A)-C(15)-C(12)  | 118.4(12) |
| C(17A)-C(15)-C(18A) | 105(2)    |
| C(17A)-C(15)-C(16A) | 111.1(16) |
| C(18A)-C(15)-C(12)  | 112.9(17) |
| C(18A)-C(15)-C(16A) | 98(2)     |
| C(16A)-C(15)-C(12)  | 109.1(10) |
| C(25)-C(27)-H(27A)  | 109.5     |
| C(25)-C(27)-H(27B)  | 109.5     |
| C(25)-C(27)-H(27C)  | 109.5     |
| H(27A)-C(27)-H(27B) | 109.5     |
| H(27A)-C(27)-H(27C) | 109.5     |
| H(27B)-C(27)-H(27C) | 109.5     |
| C(7)-C(8)-H(8A)     | 109.5     |
| C(7)-C(8)-H(8B)     | 109.5     |
| C(7)-C(8)-H(8C)     | 109.5     |
| H(8A)-C(8)-H(8B)    | 109.5     |
| H(8A)-C(8)-H(8C)    | 109.5     |
| H(8B)-C(8)-H(8C)    | 109.5     |
| C(25)-C(26)-H(26A)  | 109.5     |
| C(25)-C(26)-H(26B)  | 109.5     |
| C(25)-C(26)-H(26C)  | 109.5     |
| H(26A)-C(26)-H(26B) | 109.5     |
| H(26A)-C(26)-H(26C) | 109.5     |
| H(26B)-C(26)-H(26C) | 109.5     |
| C(15)-C(16)-H(16A)  | 109.5     |
| C(15)-C(16)-H(16B)  | 109.5     |
| C(15)-C(16)-H(16C)  | 109.5     |
| H(16A)-C(16)-H(16B) | 109.5     |
| H(16A)-C(16)-H(16C) | 109.5     |
| H(16B)-C(16)-H(16C) | 109.5     |
| C(25)-C(28)-H(28A)  | 109.5     |
| C(25)-C(28)-H(28B)  | 109.5     |
| C(25)-C(28)-H(28C)  | 109.5     |
| H(28A)-C(28)-H(28B) | 109.5     |
| H(28A)-C(28)-H(28C) | 109.5     |
| H(28B)-C(28)-H(28C) | 109.5     |
| C(15)-C(17)-H(17A)  | 109.5     |
| C(15)-C(17)-H(17B)  | 109.5     |
| C(15)-C(17)-H(17C)  | 109.5     |
| H(17A)-C(17)-H(17B) | 109.5     |
| H(17A)-C(17)-H(17C) | 109.5     |
| H(17B)-C(17)-H(17C) | 109.5     |
| C(15)-C(18)-H(18A)  | 109.5     |
| C(15)-C(18)-H(18B)  | 109.5     |
| C(15)-C(18)-H(18C)  | 109.5     |
| H(18A)-C(18)-H(18B) | 109.5     |

|                      |       |
|----------------------|-------|
| H(18A)-C(18)-H(18C)  | 109.5 |
| H(18B)-C(18)-H(18C)  | 109.5 |
| C(15)-C(17A)-H(17D)  | 109.5 |
| C(15)-C(17A)-H(17E)  | 109.5 |
| C(15)-C(17A)-H(17F)  | 109.5 |
| H(17D)-C(17A)-H(17E) | 109.5 |
| H(17D)-C(17A)-H(17F) | 109.5 |
| H(17E)-C(17A)-H(17F) | 109.5 |
| C(15)-C(18A)-H(18D)  | 109.5 |
| C(15)-C(18A)-H(18E)  | 109.5 |
| C(15)-C(18A)-H(18F)  | 109.5 |
| H(18D)-C(18A)-H(18E) | 109.5 |
| H(18D)-C(18A)-H(18F) | 109.5 |
| H(18E)-C(18A)-H(18F) | 109.5 |
| C(15)-C(16A)-H(16D)  | 109.5 |
| C(15)-C(16A)-H(16E)  | 109.5 |
| C(15)-C(16A)-H(16F)  | 109.5 |
| H(16D)-C(16A)-H(16E) | 109.5 |
| H(16D)-C(16A)-H(16F) | 109.5 |
| H(16E)-C(16A)-H(16F) | 109.5 |

---

Symmetry transformations used to generate equivalent atoms:

#1 x,-y+1/2,-z+1/2

**Table S4.** Anisotropic displacement parameters ( $\text{\AA}^2 \times 10^3$ ) for compound **2\_200K\_sq**. The anisotropic displacement factor exponent takes the form:  $-2\sigma^2 [ h^2 a^*2U^{11} + \dots + 2 h k a^* b^* U^{12} ]$

|        | U <sup>11</sup> | U <sup>22</sup> | U <sup>33</sup> | U <sup>23</sup> | U <sup>13</sup> | U <sup>12</sup> |
|--------|-----------------|-----------------|-----------------|-----------------|-----------------|-----------------|
| I(1)   | 20(1)           | 27(1)           | 40(1)           | -3(1)           | 0               | 0               |
| I(2)   | 23(1)           | 42(1)           | 39(1)           | 0(1)            | 0               | 0               |
| O(1)   | 33(2)           | 31(2)           | 74(2)           | -10(2)          | -2(2)           | -1(1)           |
| O(3)   | 43(2)           | 46(2)           | 76(2)           | -12(2)          | 4(2)            | -2(2)           |
| O(2)   | 33(2)           | 40(2)           | 92(3)           | -10(2)          | -5(2)           | 1(2)            |
| C(4)   | 14(2)           | 25(3)           | 29(2)           | -2(3)           | 0               | 0               |
| C(1)   | 17(2)           | 24(3)           | 30(2)           | 2(3)            | 0               | 0               |
| C(3)   | 25(2)           | 27(3)           | 27(2)           | -1(2)           | -2(2)           | 2(2)            |
| C(2)   | 29(2)           | 28(3)           | 26(2)           | -1(2)           | 4(2)            | 0(2)            |
| C(19)  | 34(2)           | 34(2)           | 26(2)           | 3(2)            | -2(2)           | 0(2)            |
| O(4)   | 43(2)           | 78(3)           | 125(4)          | -18(3)          | 2(2)            | 7(2)            |
| C(9)   | 35(2)           | 42(3)           | 28(2)           | 2(2)            | 7(2)            | -2(2)           |
| C(10)  | 68(4)           | 35(3)           | 51(3)           | 3(2)            | 24(3)           | 3(3)            |
| C(22)  | 60(3)           | 48(3)           | 36(2)           | -2(2)           | -14(2)          | 3(3)            |
| C(5)   | 38(3)           | 33(3)           | 55(3)           | -2(2)           | -2(2)           | 2(2)            |
| C(20)  | 93(4)           | 34(3)           | 44(3)           | -10(2)          | -32(3)          | 8(3)            |
| C(12)  | 59(3)           | 68(4)           | 50(3)           | 3(3)            | 23(3)           | -5(3)           |
| C(11)  | 78(4)           | 47(3)           | 66(4)           | 12(3)           | 34(3)           | -4(3)           |
| C(7)   | 54(4)           | 55(4)           | 68(4)           | -3(3)           | 6(3)            | 13(3)           |
| C(24)  | 97(5)           | 33(3)           | 49(3)           | 2(2)            | -28(3)          | -4(3)           |
| C(23)  | 101(5)          | 43(4)           | 50(3)           | -9(2)           | -36(3)          | 1(3)            |
| C(21)  | 111(5)          | 33(3)           | 55(3)           | -4(3)           | -39(3)          | 7(3)            |
| C(25)  | 109(5)          | 53(4)           | 45(3)           | -8(3)           | -36(3)          | 4(4)            |
| C(14)  | 98(5)           | 46(3)           | 46(3)           | -11(2)          | 29(3)           | -19(3)          |
| C(6)   | 50(3)           | 38(3)           | 129(6)          | -19(3)          | 4(4)            | 4(3)            |
| C(13)  | 99(5)           | 74(5)           | 58(3)           | -28(3)          | 39(3)           | -16(4)          |
| C(15)  | 99(5)           | 109(5)          | 64(4)           | 4(4)            | 49(3)           | -12(4)          |
| C(27)  | 202(10)         | 97(6)           | 103(6)          | 11(5)           | -110(7)         | -17(6)          |
| C(8)   | 94(6)           | 58(4)           | 119(6)          | -20(4)          | 22(5)           | 7(4)            |
| C(26)  | 244(11)         | 89(6)           | 70(5)           | -16(4)          | -97(6)          | 64(6)           |
| C(16)  | 169(19)         | 138(8)          | 86(13)          | 3(9)            | 67(11)          | -60(10)         |
| C(28)  | 216(12)         | 238(13)         | 40(4)           | 0(6)            | -7(6)           | 55(10)          |
| C(17)  | 186(17)         | 175(13)         | 210(20)         | 43(16)          | 172(16)         | 55(14)          |
| C(18)  | 181(13)         | 240(20)         | 41(5)           | -1(9)           | 34(6)           | -65(12)         |
| C(17A) | 96(18)          | 140(16)         | 57(9)           | -3(10)          | 55(10)          | -24(14)         |
| C(18A) | 190(30)         | 126(9)          | 70(20)          | 27(11)          | 60(20)          | 8(14)           |
| C(16A) | 100(7)          | 190(30)         | 60(12)          | 9(16)           | 46(8)           | -31(12)         |

**Table S5.** Hydrogen coordinates ( $\times 10^4$ ) and isotropic displacement parameters ( $\text{\AA}^2 \times 10^3$ ) for compound **2\_200K\_sq**.

|        | x    | y    | z    | U(eq) |
|--------|------|------|------|-------|
| H(10)  | 2591 | 865  | 3667 | 62    |
| H(20)  | 4076 | 860  | 3821 | 68    |
| H(11)  | 2058 | 593  | 4752 | 76    |
| H(24)  | 4180 | 3444 | 4173 | 72    |
| H(23)  | 4624 | 3181 | 5300 | 78    |
| H(21)  | 4514 | 608  | 4959 | 80    |
| H(14)  | 2797 | 3378 | 4279 | 76    |
| H(6A)  | 1604 | 5243 | 3611 | 108   |
| H(6B)  | 1185 | 5515 | 2927 | 108   |
| H(6C)  | 1908 | 5456 | 2830 | 108   |
| H(13)  | 2279 | 3073 | 5362 | 92    |
| H(27A) | 5634 | 2376 | 5995 | 201   |
| H(27B) | 5372 | 2288 | 6815 | 201   |
| H(27C) | 5070 | 2969 | 6250 | 201   |
| H(8A)  | 5002 | -427 | 1911 | 135   |
| H(8B)  | 5718 | -410 | 1745 | 135   |
| H(8C)  | 5249 | -31  | 1150 | 135   |
| H(26A) | 4768 | 386  | 6009 | 201   |
| H(26B) | 5185 | 729  | 6673 | 201   |
| H(26C) | 5443 | 734  | 5848 | 201   |
| H(16A) | 1221 | 663  | 5511 | 196   |
| H(16B) | 1287 | 654  | 6390 | 196   |
| H(16C) | 1828 | 290  | 5884 | 196   |
| H(28A) | 4088 | 2380 | 6529 | 247   |
| H(28B) | 4409 | 1726 | 7100 | 247   |
| H(28C) | 3972 | 1345 | 6471 | 247   |
| H(17A) | 1516 | 2922 | 6129 | 286   |
| H(17B) | 1027 | 2220 | 6413 | 286   |
| H(17C) | 1069 | 2453 | 5554 | 286   |
| H(18A) | 2610 | 1251 | 6450 | 228   |
| H(18B) | 2107 | 1595 | 7020 | 228   |
| H(18C) | 2478 | 2280 | 6525 | 228   |
| H(17D) | 2330 | 2130 | 6607 | 146   |
| H(17E) | 1658 | 1953 | 6914 | 146   |
| H(17F) | 1781 | 2758 | 6366 | 146   |
| H(18D) | 1760 | 288  | 5789 | 193   |
| H(18E) | 1605 | 609  | 6608 | 193   |
| H(18F) | 2294 | 623  | 6319 | 193   |
| H(16D) | 949  | 2138 | 5562 | 173   |
| H(16E) | 877  | 1417 | 6198 | 173   |
| H(16F) | 1017 | 1117 | 5370 | 173   |



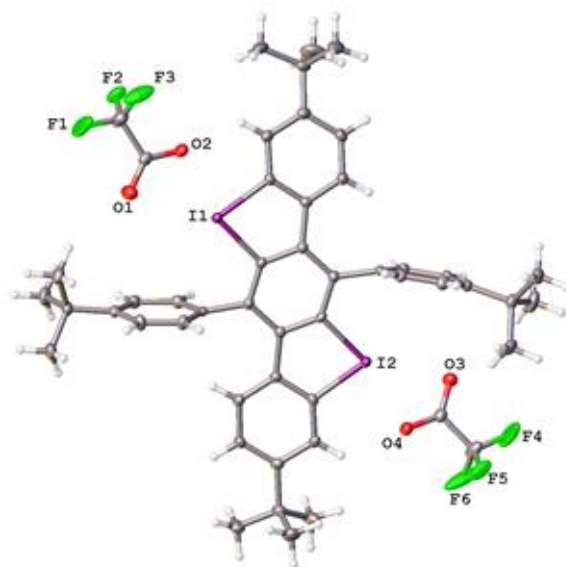

**Figure S6.** Structural diagram of compound **3**.

**Table S6.** Crystal data and structure refinement for compound **3\_0m\_a**.

|                                   |                                                                              |                          |
|-----------------------------------|------------------------------------------------------------------------------|--------------------------|
| Identification code               | compound <b>3</b>                                                            |                          |
| Empirical formula                 | C <sub>50</sub> H <sub>50</sub> F <sub>6</sub> I <sub>2</sub> O <sub>4</sub> |                          |
| Formula weight                    | 1082.70                                                                      |                          |
| Temperature                       | 100.0 K                                                                      |                          |
| Wavelength                        | 0.71073 Å                                                                    |                          |
| Crystal system                    | Triclinic                                                                    |                          |
| Space group                       | P-1                                                                          |                          |
| Unit cell dimensions              | a = 12.7903(7) Å                                                             | $\alpha$ = 67.9580(10)°. |
|                                   | b = 14.1970(6) Å                                                             | $\beta$ = 74.535(2)°.    |
|                                   | c = 14.4995(8) Å                                                             | $\gamma$ = 80.5310(10)°. |
| Volume                            | 2345.9(2) Å <sup>3</sup>                                                     |                          |
| Z                                 | 2                                                                            |                          |
| Density (calculated)              | 1.533 Mg/m <sup>3</sup>                                                      |                          |
| Absorption coefficient            | 1.407 mm <sup>-1</sup>                                                       |                          |
| F(000)                            | 1084                                                                         |                          |
| Crystal size                      | 0.26 x 0.12 x 0.08 mm <sup>3</sup>                                           |                          |
| Theta range for data collection   | 2.186 to 26.392°.                                                            |                          |
| Index ranges                      | -15 ≤ h ≤ 15, -17 ≤ k ≤ 17, -18 ≤ l ≤ 18                                     |                          |
| Reflections collected             | 40984                                                                        |                          |
| Independent reflections           | 9576 [R(int) = 0.0308]                                                       |                          |
| Completeness to theta = 25.242°   | 99.7 %                                                                       |                          |
| Absorption correction             | Semi-empirical from equivalents                                              |                          |
| Max. and min. transmission        | 0.7454 and 0.6671                                                            |                          |
| Refinement method                 | Full-matrix least-squares on F <sup>2</sup>                                  |                          |
| Data / restraints / parameters    | 9576 / 0 / 571                                                               |                          |
| Goodness-of-fit on F <sup>2</sup> | 1.031                                                                        |                          |
| Final R indices [I > 2σ(I)]       | R1 = 0.0233, wR2 = 0.0600                                                    |                          |
| R indices (all data)              | R1 = 0.0284, wR2 = 0.0634                                                    |                          |
| Extinction coefficient            | n/a                                                                          |                          |
| Largest diff. peak and hole       | 1.065 and -0.787 e.Å <sup>-3</sup>                                           |                          |

**TableS7.** Atomic coordinates ( $\times 10^4$ ) and equivalent isotropic displacement parameters ( $\text{\AA}^2 \times 10^3$ ) for compound **3\_0m\_a**.  $U(\text{eq})$  is defined as one third of the trace of the orthogonalized  $U^{ij}$  tensor.

|       | x        | y       | z       | U(eq) |
|-------|----------|---------|---------|-------|
| I(1)  | 4758(1)  | 5668(1) | 3527(1) | 16(1) |
| I(2)  | 10004(1) | 4265(1) | 1581(1) | 17(1) |
| F(2)  | 880(1)   | 7246(1) | 4277(1) | 34(1) |
| F(5)  | 14010(1) | 3134(1) | 861(1)  | 42(1) |
| O(4)  | 11794(1) | 3307(1) | 952(1)  | 28(1) |
| O(2)  | 3072(1)  | 6679(1) | 4154(1) | 28(1) |
| F(1)  | 520(1)   | 6035(2) | 5719(2) | 73(1) |
| O(3)  | 12145(1) | 4916(1) | -58(1)  | 29(1) |
| F(3)  | 1381(2)  | 7267(2) | 5552(2) | 62(1) |
| O(1)  | 2451(2)  | 5146(1) | 5132(2) | 38(1) |
| C(4)  | 8401(2)  | 4715(2) | 2179(2) | 16(1) |
| C(1)  | 6350(2)  | 5207(2) | 2903(2) | 16(1) |
| C(6)  | 6595(2)  | 4215(2) | 2898(2) | 17(1) |
| C(3)  | 8163(2)  | 5699(2) | 2194(2) | 17(1) |
| C(37) | 3994(2)  | 3152(2) | 3078(2) | 20(1) |
| F(6)  | 13726(2) | 2984(2) | -436(2) | 85(1) |
| C(27) | 9293(2)  | 2895(2) | 2000(2) | 17(1) |
| C(35) | 4384(2)  | 2519(2) | 4733(2) | 23(1) |
| C(5)  | 7681(2)  | 3959(2) | 2493(2) | 16(1) |
| C(7)  | 5450(2)  | 7078(2) | 2934(2) | 17(1) |
| C(2)  | 7071(2)  | 5973(2) | 2550(2) | 16(1) |
| C(36) | 3668(2)  | 2608(2) | 4119(2) | 19(1) |
| C(20) | 11283(2) | 6894(2) | 1329(2) | 19(1) |
| C(33) | 5655(2)  | 3554(2) | 3301(2) | 16(1) |
| C(34) | 5356(2)  | 2983(2) | 4341(2) | 21(1) |
| C(17) | 9131(2)  | 6313(2) | 1883(2) | 16(1) |
| C(19) | 10701(2) | 6577(2) | 2350(2) | 22(1) |
| C(38) | 4971(2)  | 3621(2) | 2673(2) | 20(1) |
| C(22) | 9665(2)  | 6706(2) | 855(2)  | 19(1) |
| C(32) | 8165(2)  | 2977(2) | 2382(2) | 16(1) |
| C(47) | 2369(2)  | 6070(2) | 4770(2) | 22(1) |

|       |          |          |         |        |
|-------|----------|----------|---------|--------|
| C(21) | 10726(2) | 6990(2)  | 587(2)  | 20(1)  |
| C(12) | 4834(2)  | 7984(2)  | 2894(2) | 19(1)  |
| C(49) | 12392(2) | 4009(2)  | 333(2)  | 20(1)  |
| C(30) | 8207(2)  | 1236(2)  | 2458(2) | 20(1)  |
| C(18) | 9648(2)  | 6288(2)  | 2628(2) | 20(1)  |
| F(4)  | 14206(2) | 4373(2)  | -542(2) | 122(1) |
| C(23) | 12509(2) | 7009(2)  | 1072(2) | 23(1)  |
| C(8)  | 6568(2)  | 6988(2)  | 2541(2) | 17(1)  |
| C(48) | 1272(2)  | 6640(2)  | 5083(2) | 30(1)  |
| C(46) | 1915(2)  | 2663(2)  | 5370(2) | 30(1)  |
| C(28) | 9883(2)  | 2034(2)  | 1860(2) | 18(1)  |
| C(31) | 7633(2)  | 2104(2)  | 2612(2) | 19(1)  |
| C(29) | 9330(2)  | 1176(2)  | 2080(2) | 19(1)  |
| C(10) | 6482(2)  | 8821(2)  | 2043(2) | 24(1)  |
| C(43) | 2564(2)  | 2151(2)  | 4599(2) | 22(1)  |
| C(9)  | 7081(2)  | 7903(2)  | 2097(2) | 21(1)  |
| C(11) | 5356(2)  | 8888(2)  | 2425(2) | 22(1)  |
| C(50) | 13591(2) | 3629(2)  | 55(2)   | 32(1)  |
| C(39) | 9982(2)  | 217(2)   | 1921(2) | 23(1)  |
| C(45) | 1895(2)  | 2329(2)  | 3806(2) | 31(1)  |
| C(24) | 12762(2) | 7740(2)  | 1528(2) | 29(1)  |
| C(42) | 9246(2)  | -526(2)  | 1913(2) | 33(1)  |
| C(44) | 2741(2)  | 999(2)   | 5157(2) | 32(1)  |
| C(26) | 12989(2) | 7375(2)  | -74(2)  | 37(1)  |
| C(15) | 5218(2)  | 10561(2) | 2687(3) | 42(1)  |
| C(25) | 13054(2) | 5940(2)  | 1559(2) | 31(1)  |
| C(13) | 4719(2)  | 9926(2)  | 2285(2) | 29(1)  |
| C(41) | 10812(2) | 510(2)   | 892(2)  | 35(1)  |
| C(40) | 10570(2) | -311(2)  | 2794(2) | 33(1)  |
| C(16) | 3525(2)  | 9823(2)  | 2831(3) | 48(1)  |
| C(14) | 4781(3)  | 10481(2) | 1130(3) | 55(1)  |

---

**Table S8.** Bond lengths [Å] and angles [°] for compound **3\_0m\_a**.

---

|             |          |
|-------------|----------|
| I(1)-C(1)   | 2.101(2) |
| I(1)-C(7)   | 2.101(2) |
| I(2)-C(4)   | 2.098(2) |
| I(2)-C(27)  | 2.093(2) |
| F(2)-C(48)  | 1.332(3) |
| F(5)-C(50)  | 1.319(3) |
| O(4)-C(49)  | 1.264(3) |
| O(2)-C(47)  | 1.266(3) |
| F(1)-C(48)  | 1.310(3) |
| O(3)-C(49)  | 1.222(3) |
| F(3)-C(48)  | 1.349(3) |
| O(1)-C(47)  | 1.214(3) |
| C(4)-C(3)   | 1.388(3) |
| C(4)-C(5)   | 1.394(3) |
| C(1)-C(6)   | 1.393(3) |
| C(1)-C(2)   | 1.399(3) |
| C(6)-C(5)   | 1.402(3) |
| C(6)-C(33)  | 1.501(3) |
| C(3)-C(2)   | 1.399(3) |
| C(3)-C(17)  | 1.502(3) |
| C(37)-H(37) | 0.9500   |
| C(37)-C(36) | 1.395(3) |
| C(37)-C(38) | 1.392(3) |
| F(6)-C(50)  | 1.322(3) |
| C(27)-C(32) | 1.403(3) |
| C(27)-C(28) | 1.381(3) |
| C(35)-H(35) | 0.9500   |
| C(35)-C(36) | 1.400(3) |
| C(35)-C(34) | 1.383(3) |
| C(5)-C(32)  | 1.477(3) |
| C(7)-C(12)  | 1.383(3) |
| C(7)-C(8)   | 1.394(3) |
| C(2)-C(8)   | 1.475(3) |
| C(36)-C(43) | 1.529(3) |

|              |          |
|--------------|----------|
| C(20)-C(19)  | 1.405(3) |
| C(20)-C(21)  | 1.396(3) |
| C(20)-C(23)  | 1.533(3) |
| C(33)-C(34)  | 1.397(3) |
| C(33)-C(38)  | 1.392(3) |
| C(34)-H(34)  | 0.9500   |
| C(17)-C(22)  | 1.399(3) |
| C(17)-C(18)  | 1.397(3) |
| C(19)-H(19)  | 0.9500   |
| C(19)-C(18)  | 1.383(3) |
| C(38)-H(38)  | 0.9500   |
| C(22)-H(22)  | 0.9500   |
| C(22)-C(21)  | 1.391(3) |
| C(32)-C(31)  | 1.398(3) |
| C(47)-C(48)  | 1.547(3) |
| C(21)-H(21)  | 0.9500   |
| C(12)-H(12)  | 0.9500   |
| C(12)-C(11)  | 1.393(3) |
| C(49)-C(50)  | 1.537(3) |
| C(30)-H(30)  | 0.9500   |
| C(30)-C(31)  | 1.389(3) |
| C(30)-C(29)  | 1.395(3) |
| C(18)-H(18)  | 0.9500   |
| F(4)-C(50)   | 1.308(3) |
| C(23)-C(24)  | 1.534(3) |
| C(23)-C(26)  | 1.524(3) |
| C(23)-C(25)  | 1.549(3) |
| C(8)-C(9)    | 1.400(3) |
| C(46)-H(46A) | 0.9800   |
| C(46)-H(46B) | 0.9800   |
| C(46)-H(46C) | 0.9800   |
| C(46)-C(43)  | 1.543(3) |
| C(28)-H(28)  | 0.9500   |
| C(28)-C(29)  | 1.399(3) |
| C(31)-H(31)  | 0.9500   |
| C(29)-C(39)  | 1.537(3) |

|              |          |
|--------------|----------|
| C(10)-H(10)  | 0.9500   |
| C(10)-C(9)   | 1.385(3) |
| C(10)-C(11)  | 1.400(3) |
| C(43)-C(45)  | 1.534(3) |
| C(43)-C(44)  | 1.537(3) |
| C(9)-H(9)    | 0.9500   |
| C(11)-C(13)  | 1.531(3) |
| C(39)-C(42)  | 1.531(3) |
| C(39)-C(41)  | 1.536(3) |
| C(39)-C(40)  | 1.529(3) |
| C(45)-H(45A) | 0.9800   |
| C(45)-H(45B) | 0.9800   |
| C(45)-H(45C) | 0.9800   |
| C(24)-H(24A) | 0.9800   |
| C(24)-H(24B) | 0.9800   |
| C(24)-H(24C) | 0.9800   |
| C(42)-H(42A) | 0.9800   |
| C(42)-H(42B) | 0.9800   |
| C(42)-H(42C) | 0.9800   |
| C(44)-H(44A) | 0.9800   |
| C(44)-H(44B) | 0.9800   |
| C(44)-H(44C) | 0.9800   |
| C(26)-H(26A) | 0.9800   |
| C(26)-H(26B) | 0.9800   |
| C(26)-H(26C) | 0.9800   |
| C(15)-H(15A) | 0.9800   |
| C(15)-H(15B) | 0.9800   |
| C(15)-H(15C) | 0.9800   |
| C(15)-C(13)  | 1.530(3) |
| C(25)-H(25A) | 0.9800   |
| C(25)-H(25B) | 0.9800   |
| C(25)-H(25C) | 0.9800   |
| C(13)-C(16)  | 1.524(4) |
| C(13)-C(14)  | 1.545(4) |
| C(41)-H(41A) | 0.9800   |
| C(41)-H(41B) | 0.9800   |

|                   |            |
|-------------------|------------|
| C(41)-H(41C)      | 0.9800     |
| C(40)-H(40A)      | 0.9800     |
| C(40)-H(40B)      | 0.9800     |
| C(40)-H(40C)      | 0.9800     |
| C(16)-H(16A)      | 0.9800     |
| C(16)-H(16B)      | 0.9800     |
| C(16)-H(16C)      | 0.9800     |
| C(14)-H(14A)      | 0.9800     |
| C(14)-H(14B)      | 0.9800     |
| C(14)-H(14C)      | 0.9800     |
|                   |            |
| C(1)-I(1)-C(7)    | 80.94(8)   |
| C(27)-I(2)-C(4)   | 81.08(8)   |
| C(3)-C(4)-I(2)    | 118.96(15) |
| C(3)-C(4)-C(5)    | 127.62(19) |
| C(5)-C(4)-I(2)    | 113.39(15) |
| C(6)-C(1)-I(1)    | 119.93(15) |
| C(6)-C(1)-C(2)    | 127.04(19) |
| C(2)-C(1)-I(1)    | 113.01(15) |
| C(1)-C(6)-C(5)    | 116.48(19) |
| C(1)-C(6)-C(33)   | 115.96(18) |
| C(5)-C(6)-C(33)   | 127.53(19) |
| C(4)-C(3)-C(2)    | 116.39(19) |
| C(4)-C(3)-C(17)   | 115.16(18) |
| C(2)-C(3)-C(17)   | 128.34(19) |
| C(36)-C(37)-H(37) | 119.3      |
| C(38)-C(37)-H(37) | 119.3      |
| C(38)-C(37)-C(36) | 121.4(2)   |
| C(32)-C(27)-I(2)  | 112.43(15) |
| C(28)-C(27)-I(2)  | 122.45(16) |
| C(28)-C(27)-C(32) | 125.05(19) |
| C(36)-C(35)-H(35) | 119.0      |
| C(34)-C(35)-H(35) | 119.0      |
| C(34)-C(35)-C(36) | 121.9(2)   |
| C(4)-C(5)-C(6)    | 116.05(19) |
| C(4)-C(5)-C(32)   | 115.78(18) |

|                   |            |
|-------------------|------------|
| C(6)-C(5)-C(32)   | 128.14(19) |
| C(12)-C(7)-I(1)   | 122.55(15) |
| C(12)-C(7)-C(8)   | 125.23(19) |
| C(8)-C(7)-I(1)    | 112.11(15) |
| C(1)-C(2)-C(3)    | 116.29(19) |
| C(1)-C(2)-C(8)    | 115.47(18) |
| C(3)-C(2)-C(8)    | 128.11(19) |
| C(37)-C(36)-C(35) | 117.18(19) |
| C(37)-C(36)-C(43) | 122.64(19) |
| C(35)-C(36)-C(43) | 120.16(19) |
| C(19)-C(20)-C(23) | 120.14(19) |
| C(21)-C(20)-C(19) | 117.2(2)   |
| C(21)-C(20)-C(23) | 122.3(2)   |
| C(34)-C(33)-C(6)  | 120.67(19) |
| C(38)-C(33)-C(6)  | 119.96(19) |
| C(38)-C(33)-C(34) | 118.67(19) |
| C(35)-C(34)-C(33) | 120.2(2)   |
| C(35)-C(34)-H(34) | 119.9      |
| C(33)-C(34)-H(34) | 119.9      |
| C(22)-C(17)-C(3)  | 120.30(19) |
| C(18)-C(17)-C(3)  | 119.20(19) |
| C(18)-C(17)-C(22) | 118.81(19) |
| C(20)-C(19)-H(19) | 119.0      |
| C(18)-C(19)-C(20) | 121.9(2)   |
| C(18)-C(19)-H(19) | 119.0      |
| C(37)-C(38)-H(38) | 119.7      |
| C(33)-C(38)-C(37) | 120.6(2)   |
| C(33)-C(38)-H(38) | 119.7      |
| C(17)-C(22)-H(22) | 119.8      |
| C(21)-C(22)-C(17) | 120.3(2)   |
| C(21)-C(22)-H(22) | 119.8      |
| C(27)-C(32)-C(5)  | 117.14(18) |
| C(31)-C(32)-C(27) | 115.06(19) |
| C(31)-C(32)-C(5)  | 127.80(19) |
| O(2)-C(47)-C(48)  | 111.8(2)   |
| O(1)-C(47)-O(2)   | 129.4(2)   |



|                     |            |
|---------------------|------------|
| O(1)-C(47)-C(48)    | 118.7(2)   |
| C(20)-C(21)-H(21)   | 119.3      |
| C(22)-C(21)-C(20)   | 121.3(2)   |
| C(22)-C(21)-H(21)   | 119.3      |
| C(7)-C(12)-H(12)    | 120.8      |
| C(7)-C(12)-C(11)    | 118.4(2)   |
| C(11)-C(12)-H(12)   | 120.8      |
| O(4)-C(49)-C(50)    | 113.1(2)   |
| O(3)-C(49)-O(4)     | 129.1(2)   |
| O(3)-C(49)-C(50)    | 117.8(2)   |
| C(31)-C(30)-H(30)   | 118.6      |
| C(31)-C(30)-C(29)   | 122.7(2)   |
| C(29)-C(30)-H(30)   | 118.6      |
| C(17)-C(18)-H(18)   | 120.0      |
| C(19)-C(18)-C(17)   | 120.0(2)   |
| C(19)-C(18)-H(18)   | 120.0      |
| C(20)-C(23)-C(24)   | 111.13(19) |
| C(20)-C(23)-C(25)   | 106.94(18) |
| C(24)-C(23)-C(25)   | 108.68(19) |
| C(26)-C(23)-C(20)   | 112.29(19) |
| C(26)-C(23)-C(24)   | 109.5(2)   |
| C(26)-C(23)-C(25)   | 108.2(2)   |
| C(7)-C(8)-C(2)      | 117.76(18) |
| C(7)-C(8)-C(9)      | 115.45(19) |
| C(9)-C(8)-C(2)      | 126.55(19) |
| F(2)-C(48)-F(3)     | 104.8(2)   |
| F(2)-C(48)-C(47)    | 112.04(19) |
| F(1)-C(48)-F(2)     | 108.3(2)   |
| F(1)-C(48)-F(3)     | 105.9(2)   |
| F(1)-C(48)-C(47)    | 113.7(2)   |
| F(3)-C(48)-C(47)    | 111.6(2)   |
| H(46A)-C(46)-H(46B) | 109.5      |
| H(46A)-C(46)-H(46C) | 109.5      |
| H(46B)-C(46)-H(46C) | 109.5      |
| C(43)-C(46)-H(46A)  | 109.5      |
| C(43)-C(46)-H(46B)  | 109.5      |

|                    |            |
|--------------------|------------|
| C(43)-C(46)-H(46C) | 109.5      |
| C(27)-C(28)-H(28)  | 120.6      |
| C(27)-C(28)-C(29)  | 118.8(2)   |
| C(29)-C(28)-H(28)  | 120.6      |
| C(32)-C(31)-H(31)  | 119.5      |
| C(30)-C(31)-C(32)  | 120.9(2)   |
| C(30)-C(31)-H(31)  | 119.5      |
| C(30)-C(29)-C(28)  | 117.43(19) |
| C(30)-C(29)-C(39)  | 123.50(19) |
| C(28)-C(29)-C(39)  | 119.06(19) |
| C(9)-C(10)-H(10)   | 118.6      |
| C(9)-C(10)-C(11)   | 122.7(2)   |
| C(11)-C(10)-H(10)  | 118.6      |
| C(36)-C(43)-C(46)  | 108.30(18) |
| C(36)-C(43)-C(45)  | 112.47(19) |
| C(36)-C(43)-C(44)  | 109.23(18) |
| C(45)-C(43)-C(46)  | 108.13(19) |
| C(45)-C(43)-C(44)  | 108.99(19) |
| C(44)-C(43)-C(46)  | 109.7(2)   |
| C(8)-C(9)-H(9)     | 119.8      |
| C(10)-C(9)-C(8)    | 120.5(2)   |
| C(10)-C(9)-H(9)    | 119.8      |
| C(12)-C(11)-C(10)  | 117.7(2)   |
| C(12)-C(11)-C(13)  | 121.5(2)   |
| C(10)-C(11)-C(13)  | 120.8(2)   |
| F(5)-C(50)-F(6)    | 105.2(2)   |
| F(5)-C(50)-C(49)   | 113.08(19) |
| F(6)-C(50)-C(49)   | 112.3(2)   |
| F(4)-C(50)-F(5)    | 107.4(3)   |
| F(4)-C(50)-F(6)    | 106.0(3)   |
| F(4)-C(50)-C(49)   | 112.2(2)   |
| C(42)-C(39)-C(29)  | 111.78(19) |
| C(42)-C(39)-C(41)  | 107.6(2)   |
| C(41)-C(39)-C(29)  | 110.10(18) |
| C(40)-C(39)-C(29)  | 108.23(19) |
| C(40)-C(39)-C(42)  | 109.1(2)   |

|                     |          |
|---------------------|----------|
| C(40)-C(39)-C(41)   | 110.1(2) |
| C(43)-C(45)-H(45A)  | 109.5    |
| C(43)-C(45)-H(45B)  | 109.5    |
| C(43)-C(45)-H(45C)  | 109.5    |
| H(45A)-C(45)-H(45B) | 109.5    |
| H(45A)-C(45)-H(45C) | 109.5    |
| H(45B)-C(45)-H(45C) | 109.5    |
| C(23)-C(24)-H(24A)  | 109.5    |
| C(23)-C(24)-H(24B)  | 109.5    |
| C(23)-C(24)-H(24C)  | 109.5    |
| H(24A)-C(24)-H(24B) | 109.5    |
| H(24A)-C(24)-H(24C) | 109.5    |
| H(24B)-C(24)-H(24C) | 109.5    |
| C(39)-C(42)-H(42A)  | 109.5    |
| C(39)-C(42)-H(42B)  | 109.5    |
| C(39)-C(42)-H(42C)  | 109.5    |
| H(42A)-C(42)-H(42B) | 109.5    |
| H(42A)-C(42)-H(42C) | 109.5    |
| H(42B)-C(42)-H(42C) | 109.5    |
| C(43)-C(44)-H(44A)  | 109.5    |
| C(43)-C(44)-H(44B)  | 109.5    |
| C(43)-C(44)-H(44C)  | 109.5    |
| H(44A)-C(44)-H(44B) | 109.5    |
| H(44A)-C(44)-H(44C) | 109.5    |
| H(44B)-C(44)-H(44C) | 109.5    |
| C(23)-C(26)-H(26A)  | 109.5    |
| C(23)-C(26)-H(26B)  | 109.5    |
| C(23)-C(26)-H(26C)  | 109.5    |
| H(26A)-C(26)-H(26B) | 109.5    |
| H(26A)-C(26)-H(26C) | 109.5    |
| H(26B)-C(26)-H(26C) | 109.5    |
| H(15A)-C(15)-H(15B) | 109.5    |
| H(15A)-C(15)-H(15C) | 109.5    |
| H(15B)-C(15)-H(15C) | 109.5    |
| C(13)-C(15)-H(15A)  | 109.5    |
| C(13)-C(15)-H(15B)  | 109.5    |

|                     |          |
|---------------------|----------|
| C(13)-C(15)-H(15C)  | 109.5    |
| C(23)-C(25)-H(25A)  | 109.5    |
| C(23)-C(25)-H(25B)  | 109.5    |
| C(23)-C(25)-H(25C)  | 109.5    |
| H(25A)-C(25)-H(25B) | 109.5    |
| H(25A)-C(25)-H(25C) | 109.5    |
| H(25B)-C(25)-H(25C) | 109.5    |
| C(11)-C(13)-C(14)   | 107.8(2) |
| C(15)-C(13)-C(11)   | 110.3(2) |
| C(15)-C(13)-C(14)   | 109.4(2) |
| C(16)-C(13)-C(11)   | 112.0(2) |
| C(16)-C(13)-C(15)   | 108.9(2) |
| C(16)-C(13)-C(14)   | 108.3(2) |
| C(39)-C(41)-H(41A)  | 109.5    |
| C(39)-C(41)-H(41B)  | 109.5    |
| C(39)-C(41)-H(41C)  | 109.5    |
| H(41A)-C(41)-H(41B) | 109.5    |
| H(41A)-C(41)-H(41C) | 109.5    |
| H(41B)-C(41)-H(41C) | 109.5    |
| C(39)-C(40)-H(40A)  | 109.5    |
| C(39)-C(40)-H(40B)  | 109.5    |
| C(39)-C(40)-H(40C)  | 109.5    |
| H(40A)-C(40)-H(40B) | 109.5    |
| H(40A)-C(40)-H(40C) | 109.5    |
| H(40B)-C(40)-H(40C) | 109.5    |
| C(13)-C(16)-H(16A)  | 109.5    |
| C(13)-C(16)-H(16B)  | 109.5    |
| C(13)-C(16)-H(16C)  | 109.5    |
| H(16A)-C(16)-H(16B) | 109.5    |
| H(16A)-C(16)-H(16C) | 109.5    |
| H(16B)-C(16)-H(16C) | 109.5    |
| C(13)-C(14)-H(14A)  | 109.5    |
| C(13)-C(14)-H(14B)  | 109.5    |
| C(13)-C(14)-H(14C)  | 109.5    |
| H(14A)-C(14)-H(14B) | 109.5    |
| H(14A)-C(14)-H(14C) | 109.5    |

H(14B)-C(14)-H(14C)

109.5

---

Symmetry transformations used to generate equivalent atoms:

**Table S9.** Anisotropic displacement parameters ( $\text{\AA}^2 \times 10^3$ ) for compound **3\_0m\_a**. The anisotropic displacement factor exponent takes the form:  $-2\pi^2 [ h^2 a^{*2} U^{11} + \dots + 2 h k a^* b^* U^{12} ]$

|       | $U^{11}$ | $U^{22}$ | $U^{33}$ | $U^{23}$ | $U^{13}$ | $U^{12}$ |
|-------|----------|----------|----------|----------|----------|----------|
| I(1)  | 12(1)    | 15(1)    | 19(1)    | -5(1)    | -2(1)    | 0(1)     |
| I(2)  | 12(1)    | 15(1)    | 22(1)    | -6(1)    | 0(1)     | -1(1)    |
| F(2)  | 25(1)    | 45(1)    | 26(1)    | -10(1)   | -10(1)   | 12(1)    |
| F(5)  | 27(1)    | 66(1)    | 33(1)    | -20(1)   | -15(1)   | 14(1)    |
| O(4)  | 18(1)    | 22(1)    | 37(1)    | -8(1)    | 2(1)     | -2(1)    |
| O(2)  | 19(1)    | 23(1)    | 35(1)    | -9(1)    | 2(1)     | 1(1)     |
| F(1)  | 28(1)    | 58(1)    | 76(1)    | 15(1)    | 20(1)    | 7(1)     |
| O(3)  | 25(1)    | 21(1)    | 32(1)    | -4(1)    | -3(1)    | 0(1)     |
| F(3)  | 58(1)    | 89(1)    | 60(1)    | -58(1)   | -31(1)   | 41(1)    |
| O(1)  | 32(1)    | 23(1)    | 48(1)    | -8(1)    | 3(1)     | -2(1)    |
| C(4)  | 11(1)    | 18(1)    | 18(1)    | -7(1)    | -1(1)    | 2(1)     |
| C(1)  | 12(1)    | 17(1)    | 16(1)    | -5(1)    | -2(1)    | 1(1)     |
| C(6)  | 14(1)    | 17(1)    | 16(1)    | -4(1)    | -3(1)    | -1(1)    |
| C(3)  | 16(1)    | 18(1)    | 16(1)    | -5(1)    | -3(1)    | -1(1)    |
| C(37) | 18(1)    | 22(1)    | 23(1)    | -8(1)    | -6(1)    | -1(1)    |
| F(6)  | 68(1)    | 145(2)   | 67(1)    | -82(2)   | -42(1)   | 73(1)    |
| C(27) | 18(1)    | 14(1)    | 16(1)    | -3(1)    | -3(1)    | -3(1)    |
| C(35) | 22(1)    | 25(1)    | 18(1)    | -2(1)    | -2(1)    | -8(1)    |
| C(5)  | 15(1)    | 16(1)    | 14(1)    | -4(1)    | -3(1)    | -1(1)    |
| C(7)  | 17(1)    | 15(1)    | 18(1)    | -5(1)    | -4(1)    | -4(1)    |
| C(2)  | 16(1)    | 16(1)    | 15(1)    | -5(1)    | -3(1)    | 0(1)     |
| C(36) | 16(1)    | 18(1)    | 23(1)    | -9(1)    | -2(1)    | -2(1)    |
| C(20) | 17(1)    | 17(1)    | 22(1)    | -7(1)    | -3(1)    | -2(1)    |
| C(33) | 12(1)    | 14(1)    | 21(1)    | -7(1)    | -1(1)    | 0(1)     |
| C(34) | 17(1)    | 25(1)    | 20(1)    | -5(1)    | -6(1)    | -3(1)    |
| C(17) | 13(1)    | 13(1)    | 22(1)    | -6(1)    | -2(1)    | 0(1)     |
| C(19) | 20(1)    | 28(1)    | 23(1)    | -12(1)   | -4(1)    | -2(1)    |
| C(38) | 21(1)    | 19(1)    | 18(1)    | -5(1)    | -3(1)    | -3(1)    |
| C(22) | 19(1)    | 19(1)    | 19(1)    | -3(1)    | -7(1)    | -3(1)    |
| C(32) | 16(1)    | 15(1)    | 16(1)    | -4(1)    | -3(1)    | 0(1)     |
| C(47) | 18(1)    | 27(1)    | 21(1)    | -9(1)    | -4(1)    | 1(1)     |

|       |       |       |        |        |        |        |
|-------|-------|-------|--------|--------|--------|--------|
| C(21) | 18(1) | 20(1) | 20(1)  | -4(1)  | -1(1)  | -5(1)  |
| C(12) | 15(1) | 21(1) | 22(1)  | -9(1)  | -6(1)  | 1(1)   |
| C(49) | 18(1) | 24(1) | 18(1)  | -9(1)  | -2(1)  | -1(1)  |
| C(30) | 20(1) | 14(1) | 25(1)  | -4(1)  | -4(1)  | -2(1)  |
| C(18) | 20(1) | 21(1) | 19(1)  | -10(1) | 0(1)   | -2(1)  |
| F(4)  | 23(1) | 68(2) | 163(3) | 50(2)  | 26(1)  | 3(1)   |
| C(23) | 16(1) | 28(1) | 25(1)  | -10(1) | -3(1)  | -4(1)  |
| C(8)  | 18(1) | 16(1) | 17(1)  | -7(1)  | -6(1)  | 2(1)   |
| C(48) | 23(1) | 35(1) | 21(1)  | -4(1)  | -1(1)  | 5(1)   |
| C(46) | 18(1) | 39(2) | 33(1)  | -18(1) | 3(1)   | -6(1)  |
| C(28) | 15(1) | 18(1) | 18(1)  | -3(1)  | -3(1)  | 1(1)   |
| C(31) | 15(1) | 19(1) | 21(1)  | -6(1)  | -1(1)  | -1(1)  |
| C(29) | 21(1) | 17(1) | 16(1)  | -4(1)  | -3(1)  | 2(1)   |
| C(10) | 23(1) | 17(1) | 31(1)  | -8(1)  | -5(1)  | -4(1)  |
| C(43) | 16(1) | 24(1) | 26(1)  | -9(1)  | -1(1)  | -5(1)  |
| C(9)  | 17(1) | 19(1) | 28(1)  | -9(1)  | -2(1)  | -3(1)  |
| C(11) | 21(1) | 20(1) | 28(1)  | -11(1) | -9(1)  | 1(1)   |
| C(50) | 21(1) | 38(2) | 22(1)  | -1(1)  | 2(1)   | 4(1)   |
| C(39) | 23(1) | 16(1) | 27(1)  | -7(1)  | -2(1)  | 1(1)   |
| C(45) | 21(1) | 40(2) | 36(1)  | -15(1) | -5(1)  | -10(1) |
| C(24) | 21(1) | 29(1) | 39(2)  | -12(1) | -7(1)  | -6(1)  |
| C(42) | 30(1) | 24(1) | 46(2)  | -18(1) | -2(1)  | 0(1)   |
| C(44) | 23(1) | 26(1) | 43(2)  | -8(1)  | 0(1)   | -9(1)  |
| C(26) | 18(1) | 56(2) | 31(1)  | -10(1) | 0(1)   | -10(1) |
| C(15) | 31(2) | 27(1) | 78(2)  | -32(2) | -14(1) | 3(1)   |
| C(25) | 19(1) | 36(1) | 40(2)  | -16(1) | -10(1) | 4(1)   |
| C(13) | 26(1) | 18(1) | 47(2)  | -14(1) | -11(1) | 2(1)   |
| C(41) | 36(2) | 20(1) | 39(2)  | -11(1) | 9(1)   | 2(1)   |
| C(40) | 31(1) | 25(1) | 40(2)  | -9(1)  | -12(1) | 8(1)   |
| C(16) | 24(1) | 26(1) | 97(3)  | -31(2) | -11(2) | 6(1)   |
| C(14) | 73(2) | 28(2) | 59(2)  | -7(1)  | -30(2) | 16(2)  |

---

Table S10. Hydrogen coordinates ( $\times 10^4$ ) and isotropic displacement parameters ( $\text{\AA}^2 \times 10^{-3}$ ) for compound **3\_0m\_a**.

|        | x     | y     | z    | U(eq) |
|--------|-------|-------|------|-------|
| H(37)  | 3540  | 3204  | 2636 | 24    |
| H(35)  | 4198  | 2128  | 5441 | 27    |
| H(34)  | 5821  | 2913  | 4779 | 25    |
| H(19)  | 11040 | 6561  | 2865 | 27    |
| H(38)  | 5173  | 3990  | 1961 | 24    |
| H(22)  | 9302  | 6778  | 337  | 23    |
| H(21)  | 11077 | 7256  | -114 | 24    |
| H(12)  | 4074  | 7989  | 3179 | 22    |
| H(30)  | 7819  | 659   | 2617 | 24    |
| H(18)  | 9276  | 6073  | 3326 | 24    |
| H(46A) | 2321  | 2544  | 5894 | 45    |
| H(46B) | 1208  | 2372  | 5693 | 45    |
| H(46C) | 1804  | 3397  | 5012 | 45    |
| H(28)  | 10651 | 2024  | 1619 | 22    |
| H(31)  | 6869  | 2105  | 2876 | 23    |
| H(10)  | 6851  | 9431  | 1733 | 28    |
| H(9)   | 7845  | 7894  | 1830 | 25    |
| H(45A) | 1201  | 2016  | 4147 | 47    |
| H(45B) | 2300  | 2021  | 3300 | 47    |
| H(45C) | 1757  | 3062  | 3463 | 47    |
| H(24A) | 13550 | 7792  | 1361 | 43    |
| H(24B) | 12497 | 7479  | 2271 | 43    |
| H(24C) | 12402 | 8414  | 1241 | 43    |
| H(42A) | 8710  | -732  | 2564 | 50    |
| H(42B) | 9688  | -1130 | 1816 | 50    |
| H(42C) | 8869  | -193  | 1353 | 50    |
| H(44A) | 3119  | 881   | 5700 | 49    |
| H(44B) | 3181  | 681   | 4671 | 49    |
| H(44C) | 2035  | 701   | 5454 | 49    |
| H(26A) | 12637 | 8043  | -400 | 55    |



|        |       |       |      |    |
|--------|-------|-------|------|----|
| H(26B) | 12867 | 6886  | -358 | 55 |
| H(26C) | 13772 | 7433  | -202 | 55 |
| H(15A) | 5194  | 10202 | 3415 | 62 |
| H(15B) | 4804  | 11223 | 2590 | 62 |
| H(15C) | 5975  | 10664 | 2313 | 62 |
| H(25A) | 13845 | 5977  | 1394 | 46 |
| H(25B) | 12880 | 5461  | 1290 | 46 |
| H(25C) | 12784 | 5706  | 2302 | 46 |
| H(41A) | 10435 | 905   | 344  | 53 |
| H(41B) | 11180 | -109  | 771  | 53 |
| H(41C) | 11350 | 920   | 905  | 53 |
| H(40A) | 11049 | 158   | 2798 | 50 |
| H(40B) | 11003 | -918  | 2698 | 50 |
| H(40C) | 10033 | -512  | 3445 | 50 |
| H(16A) | 3189  | 9445  | 2556 | 71 |
| H(16B) | 3148  | 10502 | 2726 | 71 |
| H(16C) | 3470  | 9455  | 3563 | 71 |
| H(14A) | 5544  | 10567 | 767  | 83 |
| H(14B) | 4382  | 11151 | 1019 | 83 |
| H(14C) | 4458  | 10078 | 873  | 83 |

---

## Computational Studies

Single point energy calculations on compounds **1-3** were conducted using the Gaussian09 program<sup>3</sup> using the geometries and methods and basis sets as recently reported (B3LYP 6-31+g(d,p) and SDD pseudopotential for iodine).<sup>4</sup> Bond critical points were analyzed using Multiwfn<sup>5</sup> and visualized using AIMALL.<sup>6</sup> Visualization of the non-covalent interactions (NCI plots) were conducted using VMD 1.94.<sup>7</sup>

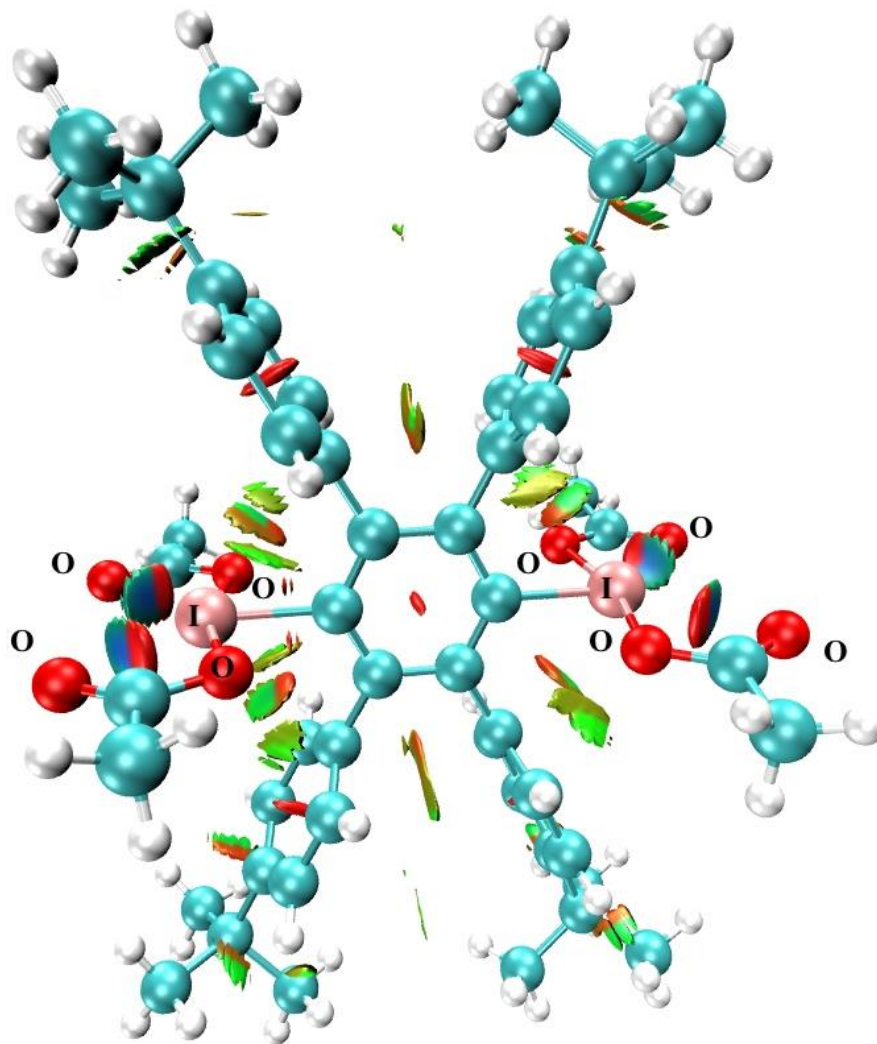

**Figure S7.** Computed NCI plots of compound **2**. The surface color red indicates repulsions, green van der Waals attractions and/or weak interactions, and blue stronger attractive interactions.

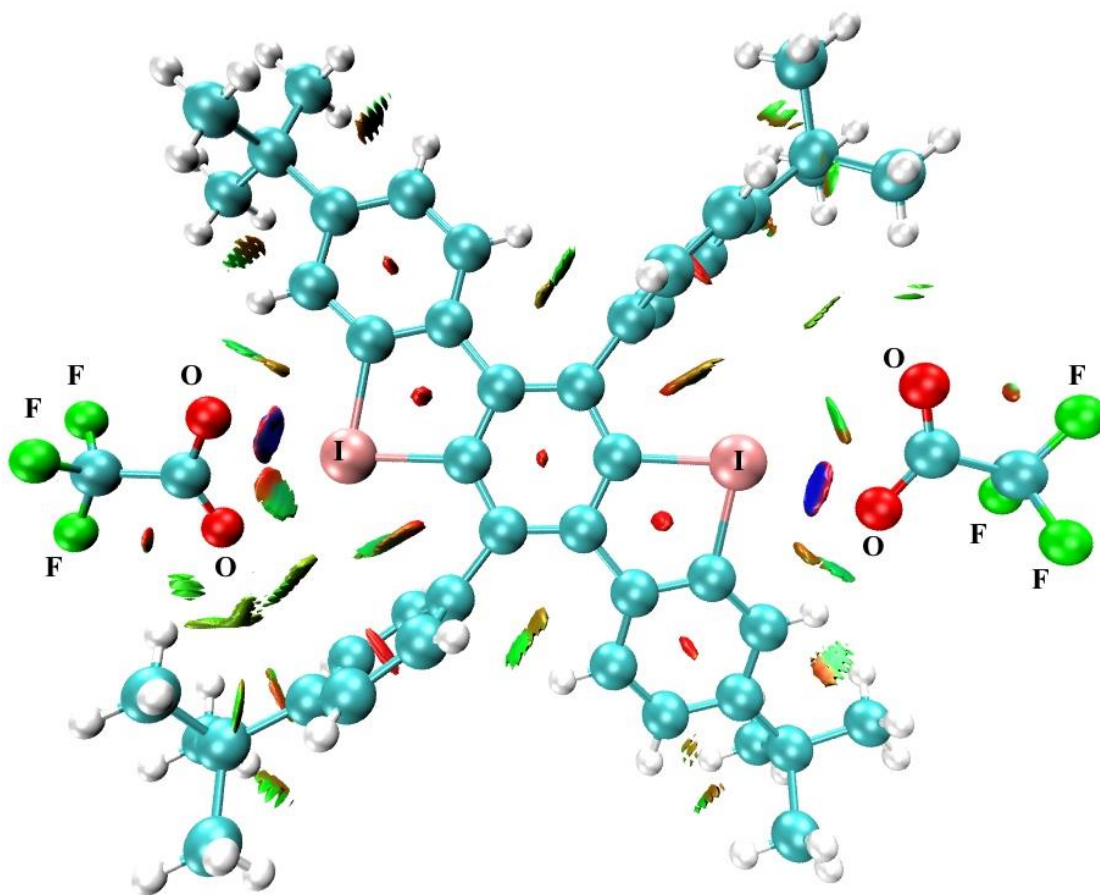

**Figure S8.** Computed NCI plots of compound **3**. The surface color red indicates repulsions, green van der Waals attractions and/or weak interactions, and blue stronger attractive interactions.

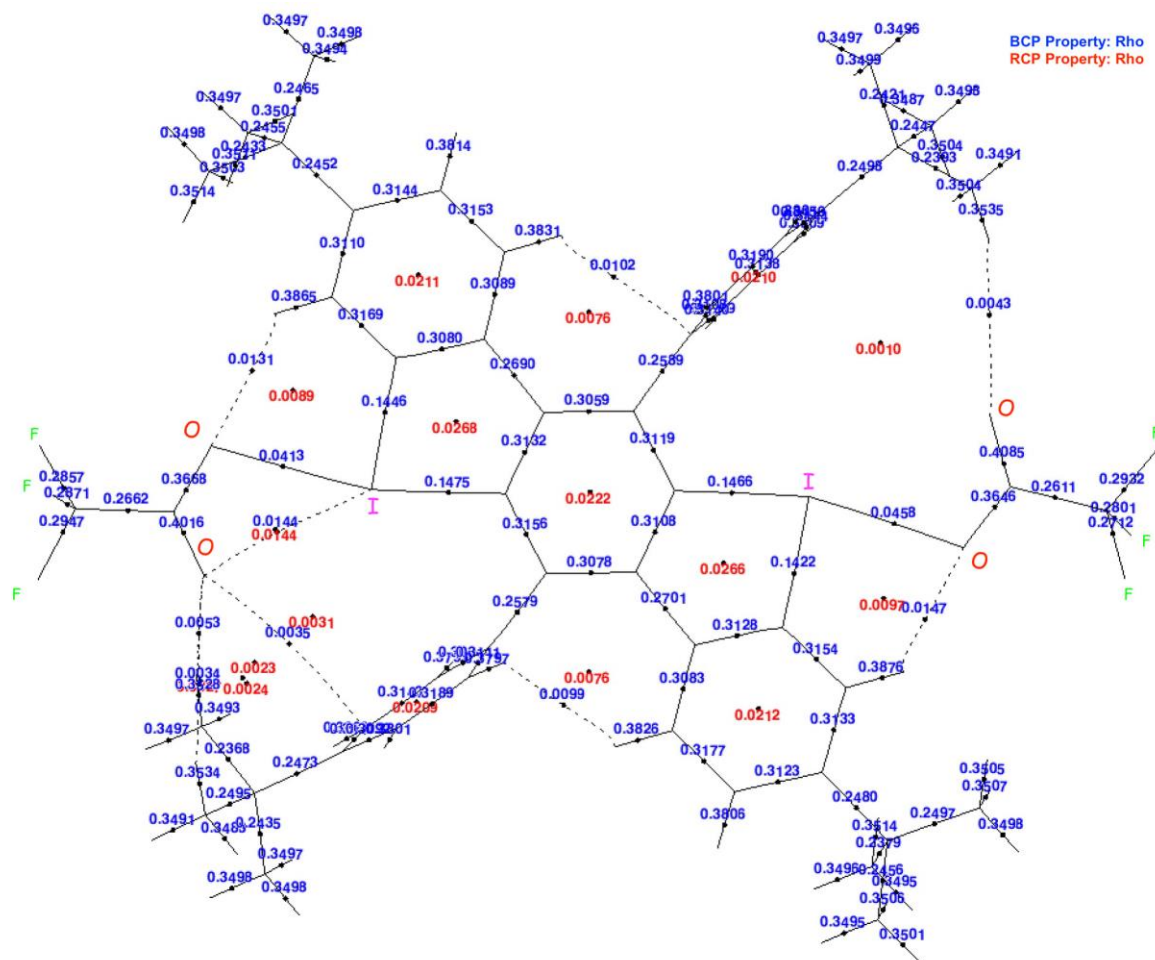

Figure S9. Computed NCI plots of compound 3.

## References

1. Shah, S.; Eichler, B.E.; Smith, R.C.; Power, P.P.; Protasiewicz, J.D. *New J. Chem.* **2003**, *27*, 442–445.
2. Watanabe, A.; Miyamoto, K.; Okada, T.; Asawa, T.; Uchiyama, M. *J. Org. Chem.* **2018**, *83*, 14262–14268.
3. Gaussian 09, Revision C.01, Frisch, M.J.; Trucks, G.W.; Schlegel, H.B.; Scuseria, G.E.; Robb, M.A.; Cheeseman, J.R.; Scalmani, G.; Barone, V.; Petersson, G.A.; Nakatsuji, H.; Li, X.; Caricato, M.; Marenich, A.; Bloino, J.; Janesko, B.G.; Gomperts, R.; Mennucci, B.; Hratchian, H.P.; Ortiz, J.V.; Izmaylov, A.F.; Sonnenberg, J.L.; Williams-Young, D.; Ding, F.; Lipparini, F.; Egidi, F.; Goings, J.; Peng, B.; Petrone, A.; Henderson, T.; Ranasinghe, D.; Zakrzewski, V.G.; Gao, J.; Rega, N.; Zheng, G.; Liang, W.; Hada, M.; Ehara, M.; Toyota, K.; Fukuda, R.; Hasegawa, J.; Ishida, M.; Nakajima, T.; Honda, Y.; Kitao, O.; Nakai, H.; Vreven, T.; Throssell, K.; Montgomery, J.A.; Peralta, J.E.; Ogliaro, F.; Bearpark, M.; Heyd, J.; Brothers, E.; Kudin, K.N.; Staroverov, V.N.; Keith, T.; Kobayashi, R.; Normand, J.; Raghavachari, K.; Rendell, A.; Burant, J.C.; Iyengar, S.S.; Tomasi, J.; Cossi, M.; Millam, J.M.; Klene, M.; Adamo, C.; Cammi, R.; Ochterski, J.W.; Martin, R.L.; Morokuma, K.; Farkas, O.; Foresman, J.B.; Fox, D.J. Gaussian, Inc., Wallingford CT, **2016**.
4. Radzhabov, M.R.; Sheremetev, A.B.; Pivina, T.S. Oxidative ability of organic iodine(III) reagents: a theoretical assessment. *New J. Chem.*, **2020**, *44*, 7051-7057.
5. Lu, T.; Chen, F. Multiwfn: A Multifunctional Wavefunction Analyzer, *J. Comput. Chem.*, **2012**, *33*, 580-592.
6. AIMAll (Version 19.10.12), Todd A. Keith, TK Gristmill Software, Overland Park KS, USA, **2019** ([aim.tkgristmill.com](http://aim.tkgristmill.com))
7. Humphrey, W.; Dalke, A.; Schulten, K. "VMD - Visual Molecular Dynamics", *J. Molec. Graphics*, **1996**, *14*, 33-38.
